# Supplementary material for: Nucleolus association of chromosomal domains is largely maintained in cellular senescence despite massive nuclear reorganisation
Source: PLoS One. 2017 Jun 2;12(6):e0178821. doi: 10.1371/journal.pone.0178821 (PMC5456395; doi:10.1371/journal.pone.0178821)
Supplement: S3 Table — Genomic coordinates (hg17 and hg19 genome builds) of the genes are also shown. (XLSX) [file pone.0178821.s016.xlsx]

## Sheet: C&W2005 genes (hg17 and hg19)
hg17 coordinates				hg19 coordinates (generated by http://genome.ucsc.edu/cgi-bin/hgLiftOver)
chromosome	start	end		chromosome	start	end
chrX	72828300	72846213		chrX	73045279	73063192
chrX	132991	160020		chrX	192991	220020			Carrel and Willard. Nature 434, 400-4 (2005).
chrX	161425	170887		chrX	221425	230887
chrX	264975	292277		chrX	294975	322277			XIST		7-9 / 9		escapers
chrX	555078	582318		chrX	585078	612318			Pseudoautosomal & 9 / 9
chrX	1548876	1554808		chrX	1505049	1510981			9 / 9
chrX	1559871	1562114		chrX	1516044	1518287			8 / 9
chrX	1565860	1615583		chrX	1522033	1571756			7 / 9
chrX	1754344	1763023		chrX	1710517	1719196			6 / 9		3-6 / 9		heterogeneous
chrX	2320147	2412325		chrX	2326786	2418964			5 / 9
chrX	2397837	2412369		chrX	2404476	2419008			4 / 9
chrX	2520794	2568631		chrX	2527433	2575270			3 / 9
chrX	2575378	2577441		chrX	2582017	2584080			2 / 9		0-2 / 9		inactive
chrX	2602595	2652709		chrX	2609234	2659348			1 / 9
chrX	154791074	154804186		chrX	155227370	155240482			0 / 9
chrX	2663475	2727327		chrX	2670114	2733966
chrX	2740223	2794094		chrX	2746862	2800733		Ratios n/9 indicate that the gene of interest was transcribed in n of 9 clonal cell lines from the inactive X
chrX	2817557	2840705		chrX	2824196	2847344
chrX	2846212	2875672		chrX	2852851	2882311
chrX	3521274	3521718		chrX	3527913	3528357
chrX	5667820	6005624		chrX	5808084	6145888
chrX	6840688	6842305		chrX	6980952	6982569
chrX	6997232	7132587		chrX	7137496	7272851
chrX	7123776	7124235		chrX	7264040	7264499
chrX	7234805	7235255		chrX	7375069	7375519
chrX	7676539	7705179		chrX	7866803	7895443
chrX	8234774	8235244		chrX	8425038	8425508
chrX	8306650	8509963		chrX	8496914	8700227
chrX	13044743	13081181		chrX	13285086	13321524
chrX	13430899	13448014		chrX	13671242	13688357
chrX	13466997	13487419		chrX	13707340	13727762
chrX	13490021	13512374		chrX	13730364	13752717
chrX	13512536	13547127		chrX	13752879	13787470
chrX	13556895	13557292		chrX	13797238	13797635
chrX	13772392	13772739		chrX	14012735	14013082
chrX	13786054	13807668		chrX	14026397	14048011
chrX	15162582	15271016		chrX	15402925	15511359
chrX	15405107	15442811		chrX	15645450	15683154
chrX	15480672	15481140		chrX	15721015	15721483
chrX	15516081	15562315		chrX	15756424	15802658
chrX	15603585	15632757		chrX	15843928	15873100
chrX	15614002	15614433		chrX	15854345	15854776
chrX	15628315	15628774		chrX	15868658	15869117
chrX	16365782	16490700		chrX	16606125	16731043
chrX	16370147	16370651		chrX	16610490	16610994
chrX	16427937	16432448		chrX	16668280	16672791
chrX	16497411	16538990		chrX	16737754	16779333
chrX	16564216	16619953		chrX	16804559	16860296
chrX	16622433	16648094		chrX	16862776	16888437
chrX	19905514	19919584		chrX	20145857	20159927
chrX	23832721	23855743		chrX	24073064	24096086
chrX	23929464	23989474		chrX	24169807	24229817
chrX	26906579	26954072		chrX	27146922	27194415
chrX	40239240	40239642		chrX	40482986	40483388
chrX	40263811	40351037		chrX	40507557	40594783
chrX	40449649	40453318		chrX	40693395	40697064
chrX	40701401	40848428		chrX	40945147	41092174
chrX	40719135	40720305		chrX	40962881	40964051
chrX	40780030	40780466		chrX	41023776	41024212
chrX	40850213	40852086		chrX	41093959	41095832
chrX	40948904	40965695		chrX	41192650	41209441
chrX	43271822	43360311		chrX	43515568	43604057
chrX	44459502	44460386		chrX	44703248	44704132
chrX	45360891	45362107		chrX	45604637	45605853
chrX	45377986	45378386		chrX	45621732	45622132
chrX	46806513	46830780		chrX	47050259	47074526
chrX	46820573	46821506		chrX	47064319	47065252
chrX	46833885	46845646		chrX	47077631	47089392
chrX	53103999	53137625		chrX	53220978	53254604
chrX	53118327	53118606		chrX	53235306	53235585
chrX	53145078	53233543		chrX	53262057	53350522
chrX	53173394	53173645		chrX	53290373	53290624
chrX	64670947	64672712		chrX	64887926	64889691
chrX	71275474	71280162		chrX	71492453	71497141
chrX	72947198	73003347		chrX	73164177	73220326
chrX	80272466	80272920		chrX	80466321	80466775
chrX	133950816	133951059		chrX	134225296	134225539
chrX	152550557	152565642		chrX	153029710	153044795
chrX	152691375	152693458		chrX	153170528	153172611
chrX	153339765	153356964		chrX	153776061	153793260
chrX	6826696	6925883		chrX	6966960	7066147
chrX	7188013	7188477		chrX	7328277	7328741
chrX	13548806	13716488		chrX	13789149	13956831
chrX	40244538	40263060		chrX	40488284	40506806
chrX	44139158	44158470		chrX	44382904	44402216
chrX	73006349	73006724		chrX	73223328	73223703
chrX	73010472	73011872		chrX	73227451	73228851
chrX	80263745	80360187		chrX	80457600	80554042
chrX	152648233	152662157		chrX	153127386	153141310
chrX	153467233	153543036		chrX	153903529	153979332
chrX	3190245	3190418		chrX	3196884	3197057
chrX	3219970	3258042		chrX	3226609	3264681
chrX	3515771	3625010		chrX	3522410	3631649
chrX	8939046	8940978		chrX	9129310	9131242
chrX	9242774	9497513		chrX	9433038	9687777
chrX	9503189	9543653		chrX	9693453	9733917
chrX	12813408	12822457		chrX	13053751	13062800
chrX	13071351	13071729		chrX	13311694	13312072
chrX	53089775	53090342		chrX	53206754	53207321
chrX	53284090	53332639		chrX	53401069	53449618
chrX	53332859	53339797		chrX	53449838	53456776
chrX	72989950	72990483		chrX	73206929	73207462
chrX	84922330	84924566		chrX	85116185	85118421
chrX	92732076	92734753		chrX	92925931	92928608
chrX	99734472	99735060		chrX	99928327	99928915
chrX	99735633	99792643		chrX	99929488	99986498
chrX	114784048	114815227
chrX	152693677	152712545		chrX	153172830	153191698
chrX	152721568	152730922		chrX	153200721	153210075
chrX	15901335	15930598		chrX	16141678	16170941
chrX	84925656	85108711		chrX	85119511	85302566
chrX	96105566	96106244		chrX	96299421	96300099
chrX	152733854	152757666		chrX	153213007	153236819
chrX	9936063	10013256		chrX	10126327	10203520
chrX	78422027	78428949		chrX	78615882	78622804
chrX	96531254	96531834		chrX	96725109	96725689
chrX	99705369	99732435		chrX	99899224	99926290
chrX	102736572	102749137		chrX	102930427	102942992
chrX	106321826	106324787		chrX	106515681	106518642
chrX	106649779	106654624		chrX	106843634	106848479
chrX	110730557	110738169		chrX	110924412	110932024
chrX	110776222	110810017		chrX	110970077	111003872
chrX	135295644	135300118		chrX	135570124	135574598
chrX	152716223	152721315		chrX	153195376	153200468
chrX	152759089	152769491		chrX	153238242	153248644
chrX	19313176	19665376		chrX	19553519	19905719
chrX	46848685	46863604		chrX	47092431	47107350
chrX	48298458	48306065		chrX	48542208	48549815
chrX	65598503	65618894		chrX	65815482	65835873
chrX	75432663	75433015		chrX	75649963	75650315
chrX	76972368	77108356		chrX	77166223	77302211
chrX	95945051	95946593		chrX	96138906	96140448
chrX	96537729	96538089		chrX	96731584	96731944
chrX	100544941	100546052		chrX	100738796	100739907
chrX	102136896	102154160		chrX	102330751	102348015
chrX	102417567	102419526		chrX	102611422	102613381
chrX	102748357	102752838		chrX	102942212	102946693
chrX	110823686	111132149		chrX	111017541	111326004
chrX	114618469	114707970		chrX	114795489	114884990
chrX	119440355	119491531		chrX	119658473	119709649
chrX	135455882	135468068		chrX	135730362	135742548
chrX	10013843	10015433		chrX	10204107	10205697
chrX	10238991	10239321		chrX	10429255	10429585
chrX	11536005	11553527		chrX	11776348	11793870
chrX	15059489	15093403		chrX	15299832	15333746
chrX	17153199	17513768		chrX	17393542	17754111
chrX	21810215	22025985		chrX	22050558	22266328
chrX	47197990	47202441		chrX	47441736	47446187
chrX	56644801	56645414		chrX	56761780	56762393
chrX	70099230	70106405		chrX	70316209	70323384
chrX	71184546	71200961		chrX	71401525	71417940
chrX	76961122	76967025		chrX	77154977	77160880
chrX	100546606	100594591		chrX	100740461	100788446
chrX	102560202	102563948		chrX	102754057	102757803
chrX	106116513	106168179		chrX	106310368	106362034
chrX	107204990	107488856		chrX	107398845	107682711
chrX	114639851	114640337		chrX	114816871	114817357
chrX	117513914	117601984		chrX	117732032	117820102
chrX	118314904	118370310		chrX	118533022	118588428
chrX	119152192	119160970		chrX	119370310	119379088
chrX	128765711	128780062		chrX	129040176	129054527
chrX	129482893	129762743		chrX	129757358	130037208
chrX	133425392	133518029		chrX	133699872	133792509
chrX	133629116	133656230		chrX	133903596	133930710
chrX	148668507	148673120		chrX	149009995	149014608
chrX	152511169	152531063		chrX	152990322	153010216
chrX	153863504	153915052		chrX	154299800	154351348
chrX	154070159	154127661		chrX	154506455	154563957
chrX	11916242	12500186		chrX	12156585	12740529
chrX	16724470	16925392		chrX	16964813	17165735
chrX	18203413	18431404		chrX	18443756	18671747
chrX	18389314	18390443		chrX	18629657	18630786
chrX	18410794	18413409		chrX	18651137	18653752
chrX	18417693	18449860		chrX	18658036	18690203
chrX	18670747	18761924		chrX	18911090	19002267
chrX	19358732	19359244		chrX	19599075	19599587
chrX	23173932	23174345		chrX	23414275	23414688
chrX	23479277	23521018		chrX	23719620	23761361
chrX	30608107	30752858		chrX	30848450	30993201
chrX	30953318	30953813		chrX	31193661	31194156
chrX	39667294	39712880		chrX	39911070	39956656
chrX	48800637	48813032		chrX	49044266	49056661
chrX	49860575	49927945		chrX	50027539	50094909
chrX	56473092	56476399		chrX	56590071	56593378
chrX	56646583	56647012		chrX	56763562	56763991
chrX	57196159	57398647		chrX	57313138	57515626
chrX	69288981	69292893		chrX	69505960	69509872
chrX	71207536	71241898		chrX	71424515	71458877
chrX	71345331	71345508		chrX	71562310	71562487
chrX	74056127	74159153		chrX	74273106	74376132
chrX	74057450	74058186		chrX	74274429	74275165
chrX	100406796	100409852		chrX	100600651	100603707
chrX	100410586	100447294		chrX	100604441	100641149
chrX	100452145	100456924		chrX	100646000	100650779
chrX	100458942	100469036		chrX	100652797	100662891
chrX	102123732	102125244		chrX	102317587	102319099
chrX	102637303	102648588		chrX	102831158	102842443
chrX	108585154	108594058		chrX	108779009	108787913
chrX	109052487	109227045		chrX	109246342	109420900
chrX	109069663	109070349		chrX	109263518	109264204
chrX	109247762	109367612		chrX	109441617	109561467
chrX	109388244	109388775		chrX	109582099	109582630
chrX	110145744	110270305		chrX	110339599	110464160
chrX	111680024	111729427		chrX	111873879	111923282
chrX	118455382	118481246		chrX	118673500	118699364
chrX	118749870	118768843		chrX	118967988	118986961
chrX	119519716	119528120		chrX	119737834	119746238
chrX	132160583	132274725		chrX	132435063	132549205
chrX	133232861	133288339		chrX	133507341	133562819
chrX	133319822	133360216		chrX	133594302	133634696
chrX	133747176	133774797		chrX	134021656	134049277
chrX	135801171	135829309		chrX	136075651	136103789
chrX	139590944	139592243		chrX	139865424	139866723
chrX	144604895	144612904		chrX	144899349	144907358
chrX	148335515	148335908		chrX	148629755	148630148
chrX	151757232	151812583		chrX	152086664	152142015
chrX	152466408	152466526		chrX	152945561	152945679
chrX	9793348	9919394		chrX	9983612	10109658
chrX	10224110	10398195		chrX	10414374	10588459
chrX	10397331	10397719		chrX	10587595	10587983
chrX	10915323	11443478		chrX	11155666	11683821
chrX	11030019	11030376		chrX	11270362	11270719
chrX	11934547	11934832		chrX	12174890	12175175
chrX	14307306	14509586		chrX	14547649	14749929
chrX	15105416	15106735		chrX	15345759	15347078
chrX	19694033	19744081		chrX	19934376	19984424
chrX	23560960	23563982		chrX	23801303	23804325
chrX	23677260	23677660		chrX	23917603	23918003
chrX	30897001	33117132		chrX	31137344	33357475
chrX	30972869	30973283		chrX	31213212	31213626
chrX	37187013	37292941		chrX	37430821	37536749
chrX	38176951	38304388		chrX	38420734	38548171
chrX	39715169	39719033		chrX	39958945	39962809
chrX	40196390	40222125		chrX	40440159	40465886
chrX	46221007	46221658		chrX	46464753	46465404
chrX	46222626	46374726		chrX	46466372	46618472
chrX	46694225	46708963		chrX	46937971	46952709
chrX	48073181	48084819		chrX	48316927	48328565
chrX	48401209	48408964		chrX	48644961	48652715
chrX	48574886	48584499		chrX	48818638	48828251
chrX	48586381	48614923		chrX	48830133	48858675
chrX	48776613	48781177		chrX	49020242	49024806
chrX	53341229	53344324		chrX	53458208	53461303
chrX	53442079	53596718		chrX	53559058	53713697
chrX	54349873	54354749		chrX	54466852	54471728
chrX	54354910	54405620		chrX	54471889	54522599
chrX	54907704	54908250		chrX	55024683	55025229
chrX	55052555	55070630		chrX	55169534	55187609
chrX	55361558	55362982		chrX	55478537	55479961
chrX	55930444	55930880		chrX	56047423	56047859
chrX	56638706	56728633		chrX	56755685	56845612
chrX	62429460	62563894		chrX	62646439	62780873
chrX	63264704	63265913		chrX	63481683	63482892
chrX	63919282	64037614		chrX	64136261	64254593
chrX	64491727	64510787		chrX	64708706	64727766
chrX	64515488	64537688		chrX	64732467	64754667
chrX	64670578	64744812		chrX	64887557	64961791
chrX	67650531	67728698		chrX	67867510	67945677
chrX	67831860	67844999		chrX	68048839	68061978
chrX	68163718	68168301		chrX	68380697	68385280
chrX	69292993	69379045		chrX	69509972	69596024
chrX	70581281	70616454		chrX	70798260	70833433
chrX	71304522	71309811		chrX	71521501	71526790
chrX	76968740	76969003		chrX	77162595	77162858
chrX	77816445	77818733		chrX	78010300	78012588
chrX	83121496	83123966		chrX	83315351	83317821
chrX	99689939	99697903		chrX	99883794	99891758
chrX	100611658	100615818		chrX	100805513	100809673
chrX	100716415	100720980		chrX	100910270	100914835
chrX	102024516	102025596		chrX	102218371	102219451
chrX	102391309	102393396		chrX	102585164	102587251
chrX	102837947	102853653		chrX	103031802	103047508
chrX	102886095	102893303		chrX	103079950	103087158
chrX	105227463	105259093		chrX	105421318	105452948
chrX	105949538	105978948		chrX	106143393	106172803
chrX	106110994	106111743		chrX	106304849	106305598
chrX	106171574	106171972		chrX	106365429	106365827
chrX	106677903	106700400		chrX	106871758	106894255
chrX	107133581	107140993		chrX	107327436	107334848
chrX	107141041	107203550		chrX	107334896	107397405
chrX	109724618	109845138		chrX	109918473	110038993
chrX	116813657	116888735		chrX	117031775	117106853
chrX	118384289	118387161		chrX	118602407	118605279
chrX	118840905	118859617		chrX	119059023	119077735
chrX	118988122	118993589		chrX	119206240	119211707
chrX	123239869	123823201		chrX	123514334	124097666
chrX	128598460	128629060		chrX	128872925	128903525
chrX	128639494	128654709		chrX	128913959	128929174
chrX	133683591	133684040		chrX	133958071	133958520
chrX	134955199	135019028		chrX	135229679	135293508
chrX	134989051	134989786		chrX	135263531	135264266
chrX	135648611	135655477		chrX	135923091	135929957
chrX	138534027	138639967		chrX	138808507	138914447
chrX	138576791	138577138		chrX	138851271	138851618
chrX	138899346	138900590		chrX	139173826	139175070
chrX	139994409	139994941		chrX	140268889	140269421
chrX	139995452	139996830		chrX	140269932	140271310
chrX	146699054	146738157		chrX	146993508	147032611
chrX	149605376	149737747		chrX	149934808	150067179
chrX	151827938	151831326		chrX	152157370	152160758
chrX	152796808	152806189		chrX	153275961	153285342
chrX	153044997	153079546		chrX	153524150	153558699
chrX	154008253	154031800		chrX	154444549	154468096
chrX	154282964	154283271		chrX	154719260	154719567
chrX	154674716	154737124		chrX	155111012	155173420
chrX	10889118	10899655		chrX	11129461	11139998
chrX	12569187	12601996		chrX	12809530	12842339
chrX	14621185	14650848		chrX	14861528	14891191
chrX	14651219	14699113		chrX	14891562	14939456
chrX	15097236	15113302		chrX	15337579	15353645
chrX	17515285	17532759		chrX	17755628	17773102
chrX	17577830	17638484		chrX	17818173	17878827
chrX	18017090	18132458		chrX	18257433	18372801
chrX	18124098	18124310		chrX	18364441	18364653
chrX	18863600	18864253		chrX	19103943	19104596
chrX	18867606	18874185		chrX	19107949	19114528
chrX	19121707	19137622		chrX	19362050	19377965
chrX	19784885	19894673		chrX	20025228	20135016
chrX	19933136	20044407		chrX	20173479	20284750
chrX	21634259	21635378		chrX	21874602	21875721
chrX	21718524	21772611		chrX	21958867	22012954
chrX	21940507	21950757		chrX	22180850	22191100
chrX	23445291	23464170		chrX	23685634	23704513
chrX	23765186	23804960		chrX	24005529	24045303
chrX	24243071	24311906		chrX	24483414	24552249
chrX	24318005	24318617		chrX	24558348	24558960
chrX	24335861	24450448		chrX	24576204	24690791
chrX	24471720	24774757		chrX	24712063	25015100
chrX	24583884	24584207		chrX	24824227	24824550
chrX	30431132	30508379		chrX	30671475	30748722
chrX	34404841	34435062		chrX	34645184	34675405
chrX	36964783	37072736		chrX	37208589	37316542
chrX	37454306	37463034		chrX	37698089	37706817
chrX	37649359	37742200		chrX	37893142	37985983
chrX	37764808	37836348		chrX	38008591	38080131
chrX	37884818	37942892		chrX	38128601	38186675
chrX	37892969	37893211		chrX	38136752	38136994
chrX	37968031	38036816		chrX	38211814	38280599
chrX	38414842	38415978		chrX	38658624	38659760
chrX	38419290	38421914		chrX	38663072	38665696
chrX	41130445	41133865		chrX	41374191	41377611
chrX	41134717	41538510		chrX	41378463	41782256
chrX	41304512	41312780		chrX	41548258	41556526
chrX	46063014	46089280		chrX	46306760	46333026
chrX	46161208	46163922		chrX	46404954	46407668
chrX	46189610	46214091		chrX	46433356	46457837
chrX	46215157	46218043		chrX	46458903	46461789
chrX	46452628	46498043		chrX	46696374	46741789
chrX	46528121	46676894		chrX	46771867	46920640
chrX	46646890	46647174		chrX	46890636	46890920
chrX	46757872	46760691		chrX	47001618	47004437
chrX	46760884	46802464		chrX	47004630	47046210
chrX	46986235	47029958		chrX	47229981	47273704
chrX	47062657	47098599		chrX	47306403	47342345
chrX	47176872	47187573		chrX	47420618	47431319
chrX	47188516	47235511		chrX	47432262	47479257
chrX	47239866	47245557		chrX	47483612	47489303
chrX	47251174	47253805		chrX	47494920	47497551
chrX	47267449	47274590		chrX	47511195	47518336
chrX	47452554	47537860		chrX	47696300	47781606
chrX	47590505	47619631		chrX	47834251	47863377
chrX	48090896	48101006		chrX	48334642	48344752
chrX	48123646	48135447		chrX	48367392	48379193
chrX	48136788	48143356		chrX	48380534	48387102
chrX	48154384	48175852		chrX	48398130	48419598
chrX	48189165	48192925		chrX	48432911	48436671
chrX	48193755	48195804		chrX	48437501	48439550
chrX	48212154	48219828		chrX	48455900	48463574
chrX	48221295	48223507		chrX	48465044	48467256
chrX	48311382	48323651		chrX	48555132	48567401
chrX	48416735	48439629		chrX	48660486	48683380
chrX	48445755	48450209		chrX	48689506	48693960
chrX	48506979	48511674		chrX	48750731	48755426
chrX	48512040	48516609		chrX	48755792	48760361
chrX	48517138	48525181		chrX	48760890	48768933
chrX	48526708	48532532		chrX	48770460	48776284
chrX	48535735	48571141		chrX	48779487	48814893
chrX	48567380	48568852		chrX	48811132	48812604
chrX	48642489	48657239		chrX	48886241	48900990
chrX	48672764	48683758		chrX	48916515	48927509
chrX	48685066	48687911		chrX	48928817	48931662
chrX	48688548	48714308		chrX	48932299	48958059
chrX	48718795	48720024		chrX	48962546	48963775
chrX	48726594	48736328		chrX	48970345	48980079
chrX	48784643	48787808		chrX	49028272	49031437
chrX	48788273	48799193		chrX	49031902	49042822
chrX	48817894	48846204		chrX	49061523	49089833
chrX	48848382	48863351		chrX	49092011	49106980
chrX	48863780	48877659		chrX	49107409	49121288
chrX	48882852	48912222		chrX	49126481	49155851
chrX	49344928	49346880		chrX	49641892	49643844
chrX	49390261	49560557		chrX	49687225	49857521
chrX	50167682	50390080		chrX	50334646	50557044
chrX	50908118	50913411		chrX	51075082	51080375
chrX	50982802	50984723		chrX	51149766	51151687
chrX	51065899	51072463		chrX	51232863	51239427
chrX	51319562	51322059		chrX	51486526	51489023
chrX	52859483	52870719		chrX	52976462	52987698
chrX	52874505	52876698		chrX	52991484	52993677
chrX	52961526	52990263		chrX	53078505	53107242
chrX	52994582	53000742		chrX	53111561	53117721
chrX	53037678	53039637		chrX	53154657	53156616
chrX	53081300	53083114		chrX	53198279	53200093
chrX	53846135	53953332		chrX	53963114	54070311
chrX	53865016	53866045		chrX	53981995	53983024
chrX	54102317	54105542		chrX	54219296	54222521
chrX	54105875	54267459		chrX	54222854	54384438
chrX	54439762	54474737		chrX	54556741	54591716
chrX	54717191	54725466		chrX	54834170	54842445
chrX	54830264	54840877		chrX	54947243	54957856
chrX	54842610	54903532		chrX	54959589	55020511
chrX	54909810	54917222		chrX	55026789	55034201
chrX	54918508	54940432		chrX	55035487	55057411
chrX	55394070	55394957		chrX	55511049	55511936
chrX	55627199	55668227		chrX	55744178	55785206
chrX	56142352	56194675		chrX	56259331	56311654
chrX	56900288	56904994		chrX	57017267	57021973
chrX	56985578	56985943		chrX	57102557	57102922
chrX	57043983	57046451		chrX	57160962	57163430
chrX	57502420	57503629		chrX	57619399	57620608
chrX	57817220	57819884		chrX	57934199	57936863
chrX	62350286	62353750		chrX	62567265	62570729
chrX	63227096	63233508		chrX	63444075	63450487
chrX	63270982	63398332		chrX	63487961	63615311
chrX	66546894	66727140		chrX	66763873	66944119
chrX	66730504	66733481		chrX	66947483	66950460
chrX	67045735	67436668		chrX	67262714	67653647
chrX	67094276	67094858		chrX	67311255	67311837
chrX	67394217	67394654		chrX	67611196	67611633
chrX	67501906	67535321		chrX	67718885	67752300
chrX	68618931	69042332		chrX	68835910	69259311
chrX	69136338	69169192		chrX	69353317	69386171
chrX	69139890	69140857		chrX	69356869	69357836
chrX	69170176	69171217		chrX	69387155	69388196
chrX	69271222	69284711		chrX	69488201	69501690
chrX	69447839	69505554		chrX	69664818	69722533
chrX	70063808	70071252		chrX	70280787	70288231
chrX	70121593	70145168		chrX	70338572	70362147
chrX	70147740	70173989		chrX	70364719	70390968
chrX	70242494	70257444		chrX	70459473	70474423
chrX	70286487	70304037		chrX	70503466	70521016
chrX	70304648	70308225		chrX	70521627	70525204
chrX	70369134	70467321		chrX	70586113	70684300
chrX	70535953	70578761		chrX	70752932	70795740
chrX	70618787	70621388		chrX	70835766	70838367
chrX	71129983	71134772		chrX	71346962	71351751
chrX	71583501	71716903		chrX	71800480	71933882
chrX	72215174	72217653		chrX	72432153	72434632
chrX	72566309	72686071		chrX	72783288	72903050
chrX	73199215	73201569		chrX	73416194	73418548
chrX	73208076	73211032		chrX	73425055	73428011
chrX	73212826	73216516		chrX	73429805	73433495
chrX	73222574	73223017		chrX	73439553	73439996
chrX	73240378	73242421		chrX	73457357	73459400
chrX	73252679	73255057		chrX	73469658	73472036
chrX	73269241	73272125		chrX	73486220	73489104
chrX	73424105	73536772		chrX	73641084	73753751
chrX	73593065	73617464		chrX	73810044	73834443
chrX	73736432	73928341		chrX	73953411	74145320
chrX	74739623	74740331		chrX	74956602	74957310
chrX	75175468	75180732		chrX	75392770	75398033
chrX	76567335	76847847		chrX	76761190	77041702
chrX	76888006	76957072		chrX	77081861	77150927
chrX	77165913	77188467		chrX	77359768	77382322
chrX	77191396	77201275		chrX	77385251	77395130
chrX	83125128	83254098		chrX	83318983	83447953
chrX	84065049	84148918		chrX	84258904	84342773
chrX	84153438	84169591		chrX	84347293	84363446
chrX	99881528	99902066		chrX	100075383	100095921
chrX	99996429	99996814		chrX	100190284	100190669
chrX	100070484	100113239		chrX	100264339	100307094
chrX	100140007	100157498		chrX	100333862	100351353
chrX	100160942	100224121		chrX	100354797	100417976
chrX	100281129	100322062		chrX	100474984	100515917
chrX	100403409	100405461		chrX	100597264	100599316
chrX	100469427	100475263		chrX	100663282	100669118
chrX	100676260	100679136		chrX	100870115	100872991
chrX	100684264	100688976		chrX	100878119	100882831
chrX	100689003	100689653		chrX	100882858	100883508
chrX	100696018	100696692		chrX	100889873	100890547
chrX	101186859	101188826		chrX	101380714	101382681
chrX	101574755	101577818		chrX	101768610	101771673
chrX	101660302	101665228		chrX	101854157	101859083
chrX	101773435	101778805		chrX	101967290	101972660
chrX	101781798	101813513		chrX	101975653	102007368
chrX	101784250	101784609		chrX	101978105	101978464
chrX	102276210	102278265		chrX	102470065	102472120
chrX	102314070	102316233		chrX	102507925	102510088
chrX	102370419	102371997		chrX	102564274	102565852
chrX	102437412	102439144		chrX	102631267	102632999
chrX	102690046	102692013		chrX	102883901	102885868
chrX	103023349	103039071		chrX	103217204	103232926
chrX	103163380	103166678		chrX	103357235	103360533
chrX	103150044	103207853		chrX	103343899	103401708
chrX	103173158	103175462		chrX	103367013	103369317
chrX	103180869	103207805		chrX	103374724	103401660
chrX	103217300	103240669		chrX	103411155	103434524
chrX	105661383	105728812		chrX	105855238	105922667
chrX	105852063	105925520		chrX	106045918	106119375
chrX	105949440	105952692		chrX	106143295	106146547
chrX	105990113	106034618		chrX	106183968	106228473
chrX	106762604	106825162		chrX	106956459	107019017
chrX	106875604	106976566		chrX	107069459	107170421
chrX	106943972	106985355		chrX	107137827	107179210
chrX	106977751	106981010		chrX	107171606	107174865
chrX	108673073	108674538		chrX	108866928	108868393
chrX	108690710	108782764		chrX	108884565	108976619
chrX	111823875	111890188		chrX	112017730	112084043
chrX	117261923	117373046		chrX	117480041	117591164
chrX	117422548	117423905		chrX	117640666	117642023
chrX	117643446	117677364		chrX	117861564	117895482
chrX	117890462	117933829		chrX	118108580	118151947
chrX	117938268	117938767		chrX	118156386	118156885
chrX	118152155	118160310		chrX	118370273	118378428
chrX	118490436	118500259		chrX	118708554	118718377
chrX	118501787	118502781		chrX	118719905	118720899
chrX	118504181	118521706		chrX	118722299	118739824
chrX	118531571	118609215		chrX	118749689	118827333
chrX	118537923	118538868		chrX	118756041	118756986
chrX	118702350	118707456		chrX	118920468	118925574
chrX	118786319	118787672		chrX	119004437	119005790
chrX	118812037	118836560		chrX	119030155	119054678
chrX	119166488	119174133		chrX	119384606	119392251
chrX	119174387	119227170		chrX	119392505	119445288
chrX	119346563	119385043		chrX	119564681	119603161
chrX	119346678	119349966		chrX	119564796	119568084
chrX	119541667	119545732		chrX	119759785	119763850
chrX	119907953	119909467		chrX	120182418	120183932
chrX	122470306	122592422		chrX	122744771	122866887
chrX	122719582	122773357		chrX	122994047	123047822
chrX	122820022	122961882		chrX	123094487	123236347
chrX	128306268	128382976		chrX	128580733	128657441
chrX	128399786	128452063		chrX	128674251	128726528
chrX	128504860	128514449		chrX	128779325	128788914
chrX	128665626	128703332		chrX	128940091	128977797
chrX	128842203	128917136		chrX	129116668	129191601
chrX	128924392	128970188		chrX	129198857	129244653
chrX	128956143	128956658		chrX	129230608	129231123
chrX	128988871	129025343		chrX	129263336	129299808
chrX	129019523	129020322		chrX	129293988	129294787
chrX	129199570	129232870		chrX	129474035	129507335
chrX	129261758	129273163		chrX	129536223	129547628
chrX	130882861	130935506		chrX	131157326	131209971
chrX	131066790	131067779		chrX	131341255	131342244
chrX	131078185	131292374		chrX	131352650	131566839
chrX	131231564	131237028		chrX	131506029	131511493
chrX	131238766	131349530		chrX	131513231	131623995
chrX	131247529	131247964		chrX	131521994	131522429
chrX	131295511	131297148		chrX	131569976	131571613
chrX	133385825	133386172		chrX	133660305	133660652
chrX	133403978	133406173		chrX	133678458	133680653
chrX	133408539	133408818		chrX	133683019	133683298
chrX	133666743	133714136		chrX	133941223	133988616
chrX	133757185	133757468		chrX	134031665	134031948
chrX	133850488	133851192		chrX	134124968	134125672
chrX	133891916	133893093		chrX	134166396	134167573
chrX	133896735	133897169		chrX	134171215	134171649
chrX	133899440	133899907		chrX	134173920	134174387
chrX	133910490	133911675		chrX	134184970	134186155
chrX	134145239	134203477		chrX	134419719	134477957
chrX	134204240	134222858		chrX	134478720	134497338
chrX	134380103	134441954		chrX	134654583	134716434
chrX	134793146	134854812		chrX	135067626	135129292
chrX	135027320	135059061		chrX	135301800	135333541
chrX	135305190	135320009		chrX	135579670	135594489
chrX	135473232	135589023		chrX	135747712	135863503
chrX	135681141	135687114		chrX	135955621	135961594
chrX	148264283	148264893		chrX	148558523	148559133
chrX	148269516	148292552		chrX	148563757	148586794
chrX	148328316	148334613		chrX	148622556	148628854
chrX	148338577	148342901		chrX	148632818	148637141
chrX	148343612	148344927		chrX	148637852	148639167
chrX	148383869	148419229		chrX	148678216	148713568
chrX	148801234	148802878		chrX	149130666	149132310
chrX	148870496	148870996		chrX	149199928	149200428
chrX	149284287	149353007		chrX	149613719	149682439
chrX	149324596	149325622		chrX	149654028	149655054
chrX	149407660	149512176		chrX	149737092	149841608
chrX	149444204	149445054		chrX	149773636	149774486
chrX	149532580	149604136		chrX	149862012	149933568
chrX	149555316	149555703		chrX	149884748	149885135
chrX	149590950	149591309		chrX	149920382	149920741
chrX	149622684	149623444		chrX	149952116	149952876
chrX	149822330	149829814		chrX	150151762	150159246
chrX	150236273	150248403		chrX	150565705	150577835
chrX	150792164	150813713		chrX	151121596	151143145
chrX	151666425	151669867		chrX	151995857	151999299
chrX	151670107	151708475		chrX	151999539	152037907
chrX	151911433	151913970		chrX	152240864	152243401
chrX	152096567	152101327		chrX	152612277	152617037
chrX	152231024	152256892		chrX	152710177	152736045
chrX	152281285	152295851		chrX	152760438	152775004
chrX	152322426	152366894		chrX	152801579	152846047
chrX	152374231	152385428		chrX	152853384	152864581
chrX	152385642	152386184		chrX	152864795	152865337
chrX	152428834	152437623		chrX	152907987	152916776
chrX	152567364	152572031		chrX	153046517	153051184
chrX	152572070	152580814		chrX	153051223	153059967
chrX	152580985	152584807		chrX	153060138	153063960
chrX	152588469	152616850		chrX	153067622	153096003
chrX	152808110	152883976		chrX	153287263	153363129
chrX	153097811	153123776		chrX	153576964	153602929
chrX	153128569	153130728		chrX	153607722	153609881
chrX	153134075	153134365		chrX	153613228	153613518
chrX	153147564	153151527		chrX	153626717	153630680
chrX	153150947	153159222		chrX	153630100	153638375
chrX	153177867	153183641		chrX	153657020	153662794
chrX	153234158	153235516		chrX	153670454	153671812
chrX	153236211	153242700		chrX	153672507	153678996
chrX	153250324	153264969		chrX	153686620	153701265
chrX	153269818	153271300		chrX	153706114	153707596
chrX	153275761	153278636		chrX	153712057	153714932
chrX	153279353	153282657		chrX	153715649	153718953
chrX	153298207	153308174		chrX	153734503	153744470
chrX	153323309	153339173		chrX	153759605	153775469
chrX	153361808	153362196		chrX	153798104	153798492
chrX	153525780	153526228		chrX	153962076	153962524
chrX	153554853	153569664		chrX	153991149	154005960
chrX	153570671	153597467		chrX	154006967	154033763
chrX	153627772	153814702		chrX	154064068	154250998
chrX	153818823	153847085		chrX	154255119	154283381
chrX	153851131	153852283		chrX	154287427	154288579
chrX	153853605	153863213		chrX	154289901	154299509
chrX	153918554	153920948		chrX	154354850	154357244
chrX	154029923	154030306		chrX	154466219	154466602
chrX	154051229	154057441		chrX	154487525	154493737
chrX	154250282	154252022		chrX	154686578	154688318
chrX	154259335	154261025		chrX	154695631	154697321
chrX	154283476	154406301		chrX	154719772	154842597
chrX	154561177	154570406		chrX	154997473	155006702
chrX	114168161	114291615	#Split in new	chrX	114345181	114468635
chrX	153170906	153170906	#Deleted in new
